# Supplementary material for: Enhancing the Yield of a Lab-on-a-Disk-Based Single-Image Parasite Quantification Device
Source: MDPI journal article supplement (doi:10.3390/mi14112087), 2023-11-11
Supplement: s1 [file s1]

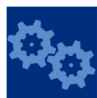

Supporting Information

# Enhancing the Yield of a Lab-on-a-Disk-Based Single-Image Parasite Quantification Device

Vyacheslav R. Misko <sup>1</sup>, Ramadhani Juma Makasali <sup>1</sup>, Matthieu Briet <sup>1</sup>, Filip Legein <sup>1</sup>, Bruno Levecke <sup>2</sup> and Wim De Malsche <sup>1,3,\*</sup>

<sup>1</sup>  $\mu$ Flow Group, Department of Chemical Engineering, Vrije Universiteit Brussel, 1050 Brussels, Belgium; veaceslav.misco@vub.be (V.R.M.); ramadhani.makasali@sua.ac.tz (R.J.M.); matthieu.briet@vub.be (M.B.); filip.legein@vub.be (F.L.)

<sup>2</sup> Department of Translational Physiology, Infectiology and Public Health, Ghent University, 9820 Merelbeke, Belgium; bruno.levecke@ugent.be

<sup>3</sup> Department of Bioengineering Sciences, Vrije Universiteit Brussel, 1050 Brussels, Belgium

\* Correspondence: wim.de.malsche@vub.be; Tel.: +32-2-6293781

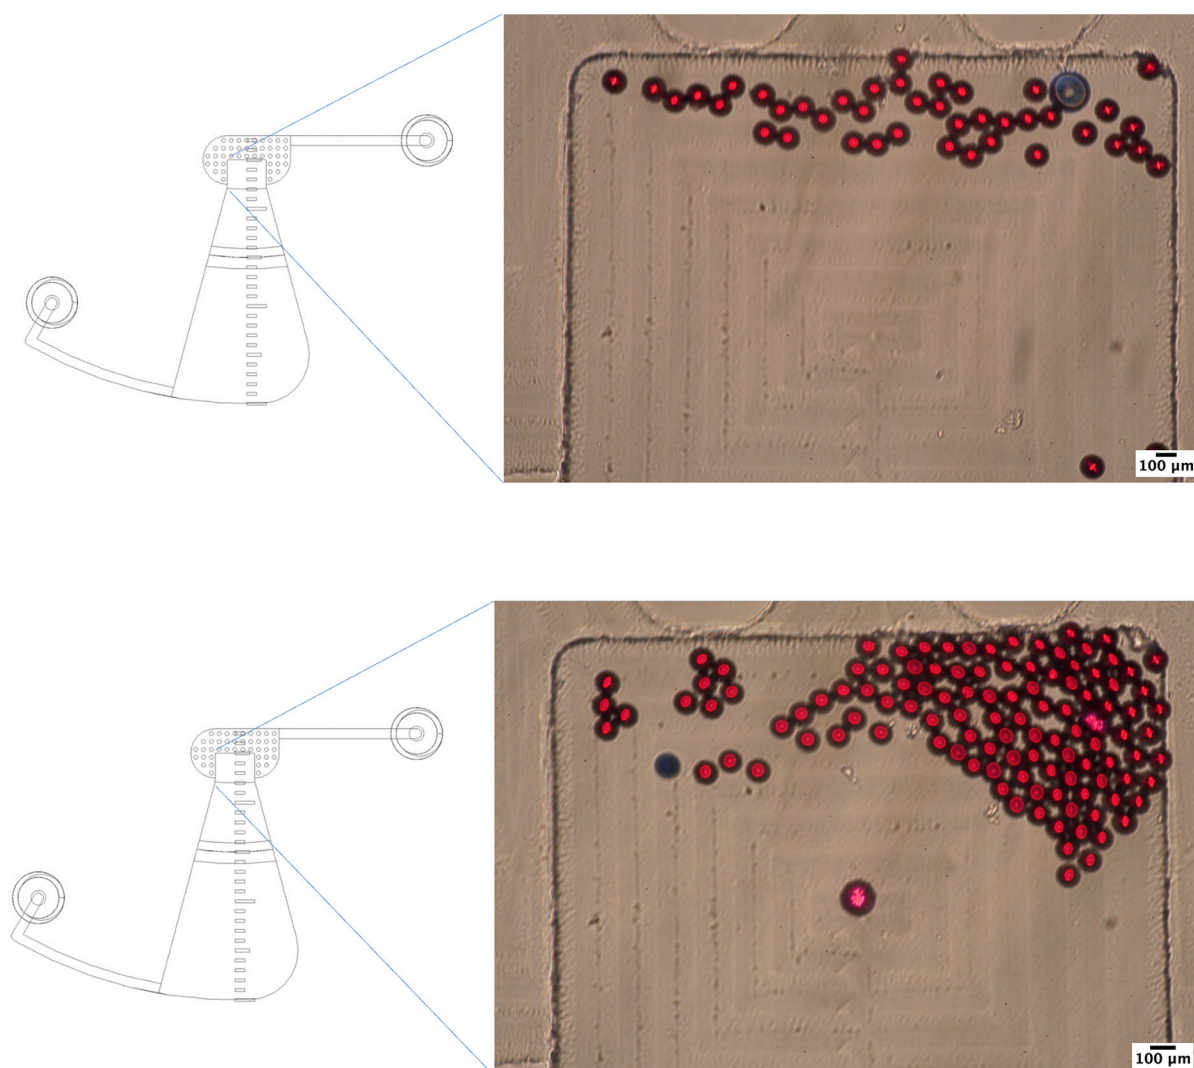

**Figure S1.** Red polystyrene particles in the FOV. The images were captured under 20× objective magnification.

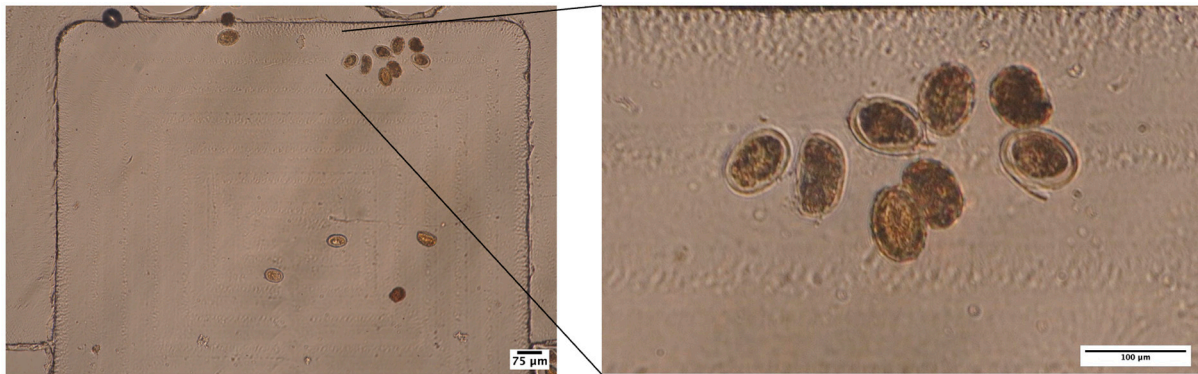

**Figure S2.** STH eggs in images captured under 20× objective magnification.
